# Supplementary material
Source: PubMed Central journal article supplement (PMC2824375)
Supplement: 0908283107_pnas.200908283SI.pdf [file 0908283107_pnas.200908283SI.pdf]

# Supporting Information

Yamagata et al. 10.1073/pnas.0908283107

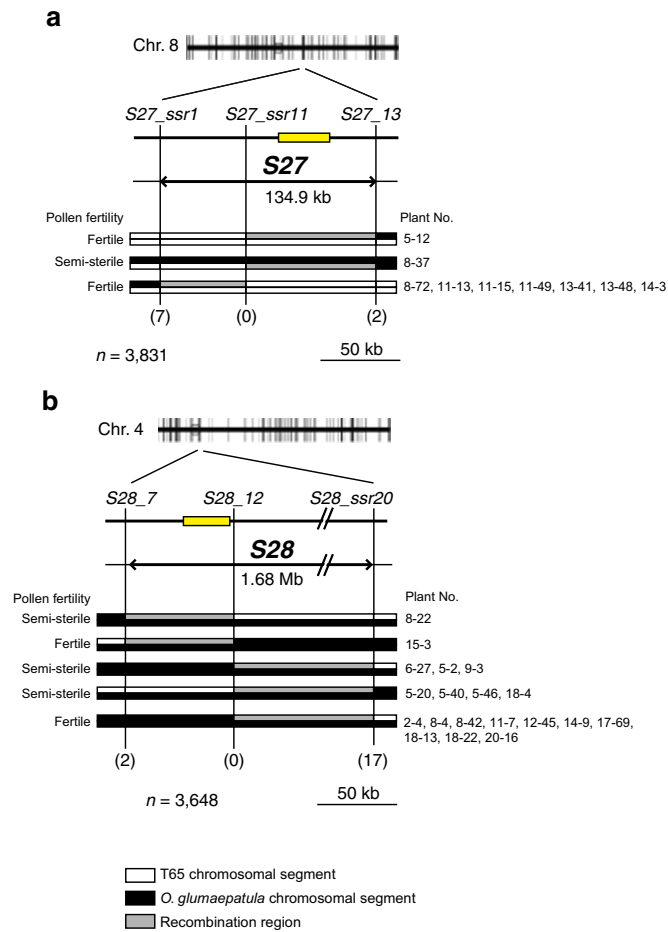

**Fig. S1.** High-resolution mapping of *S27* (A) and *S28* (B). Pollen fertility and graphical genotypes of the most informative plants for the high-resolution mapping of *S27* and *S28* are shown. Numbers of recombinants between the genes and markers are indicated in parentheses. Primers of the markers are listed in Table S2. White and black boxes show T65 and *O. glumaepatula* chromosomal segments. Recombination regions are gray. Yellow boxes indicate the location of duplicated genomic segments of *S27* and *S28* found in the rice reference sequence of Nipponbare.

|                   |     |                                                                   |     |
|-------------------|-----|-------------------------------------------------------------------|-----|
| Eco               | 1   | -----MAHKKACGSTRNGRD                                              | 15  |
| Cyano             | 1   | -----MAHKKGTGSTRNGRD                                              | 15  |
| Ram               | 1   | -----MAHKKSCGSSRNGRD                                              | 15  |
| Arabi             | 1   | MNFLNSAASICRRVSLRELITEVPAYTGSSISDSSSSGLSLVLKRWATKKTAGSTRNGRD      | 60  |
| S27-T65_mtRPL27a  | 1   | ----MAFSSVFRRGNVKELISNVSVYTSAA---ESSGGLSLIFKRWATKKTAGSTRNGRD      | 53  |
| S27-T65_mtRPL27b  | 1   | ----MAFSSVFRRGNVKELISNVSVYTSAA---ESSGGLSLIFKRWATKKTAGSTRNGRD      | 53  |
| S28-glum_mtRPL27a | 1   | ----MAFSSVFRRGNVKELISNVSVYTSAA---ESSGGLSLIFKRWATKKTAGSTRNGRD      | 53  |
| S28-T65_mtRPL27a  | 1   | ----MAFSSVFRRGNVKELISNVSVYTSAA---ESFGGLSLIFKRWATKKTAGSTRNGRD      | 53  |
|                   |     | *                                                                 |     |
| Eco               | 16  | SEAKRLGVKRLGVKSVLAGSIIVRORGTKFFHAGANVGCGRDHTLFAKADCKVKEFVKGPK     | 75  |
| Cyano             | 16  | SNAQRLGVKRYGGQTYTAGSIIVRORGTQVHPGNVGRKDDTLFALIDGVVRFHFKTRS        | 75  |
| Ram               | 16  | SKRRRLGVKRLGVKYATIGSIIVRORGTKILPYKNVGLGRDHTLFAKKEGIVSYKDKTK       | 75  |
| Arabi             | 61  | SNPKFLGVKRLGVKSVIFGNLIIVRORGTFRFHPGDYVGIKRDHTLFAKKEGRVRFBKSIT     | 120 |
| S27-T65_mtRPL27a  | 54  | SNPKYLGVKRLGVKRVFPGNLIIVRORGTFRFHPGNVYVGMGKDHTLFAKKEGHRVRFBKNLKT  | 113 |
| S27-T65_mtRPL27b  | 54  | SNPKYLGVKRLGVKRVFPGNLIIVRORGTFRFHPGNVYVGMGKDHTLFAKKEGHRVRFBKNLKT  | 113 |
| S28-glum_mtRPL27a | 54  | SNPKYLGVKRLGVKRVFPGNLIIVRORGTFRFHPGNVYVGMGKDHTLFAKKEGHRVRFBKNLKT  | 113 |
| S28-T65_mtRPL27a  | 54  | SNPKYLGVKRFGGERVFEFGNLIIVRORGTFRFHPGNVYVGMGKDHTLFAKKEGHRVRFBKNLKT | 113 |
|                   |     | * *                                                               |     |
| Eco               | 76  | NRKFIIEAE-----                                                    | 85  |
| Cyano             | 76  | REKVSVPATAE-----                                                  | 87  |
| Ram               | 76  | TYYSIV-----                                                       | 81  |
| Arabi             | 121 | GRKNIHVDPIGGHVLHPIYTKAAAAKSTKLNTAS                                | 154 |
| S27-T65_mtRPL27a  | 114 | GRKNVHVDPVAGHVLHPVYASDSTPAAEEMPL--                                | 145 |
| S27-T65_mtRPL27b  | 114 | GRKNVHVDPVAGHVLHPVYASDSTPAAEEMPL--                                | 145 |
| S28-glum_mtRPL27a | 114 | GRKNVHVDPVAGHVLHPVYASDSTPAAEEMPL--                                | 145 |
| S28-T65_mtRPL27a  | 114 | GRKNVHVDPVAGHVLHPVYASDSTPAAEEMPL--                                | 145 |

**Fig. S2.** Multiple alignments of the amino acid sequences of mtRPL27 proteins deduced from the *S27-T65*<sup>+</sup>, *S28-glum*<sup>+</sup>, and *S28-T65*<sup>s</sup> alleles. The amino acid sequences were deduced from the *S27-T65*<sup>+</sup> and *S28-glum*<sup>+</sup> transcripts and the *S28-T65*<sup>s</sup> predicted gene. Black boxes indicate identical residues in more than seven sequences. Red asterisks show the positions of the amino acid substitutions found only in the mtRPL27 protein deduced from the *S28-T65*<sup>s</sup> allele. Eco, *Escherichia coli* rpl27 (GenBank accession P02427); Cyano, the cyanobacterium *Synechocystis* sp. RPL27 (NP\_441681); Ram, *Reclinomonas americana* (NP\_044787); Arabi, *Arabidopsis thaliana* putative mitochondrial RPL27 (BAC43174). The green line indicates the signal peptide sequence for transporting mtRPL27 into mitochondria. The location of the signal peptide sequence is taken from Ueda et al. (1).

1. Ueda M et al. Promoter shuffling at a nuclear gene for mitochondrial RPL27. Involvement of interchromosome and subsequent intrachromosome recombinations *Plant Physiol* 141:702710.

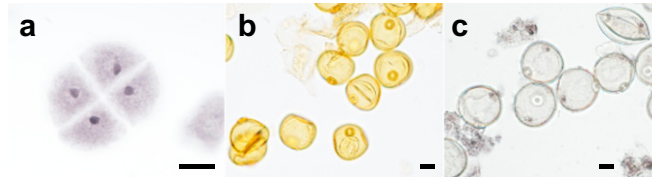

**Fig. S3.** Observation of the pollen phenotype at the tetrad and unicellular stages. (A–C) The pollen at the tetrad (A) and unicellular (B and C) stages was observed in *S28* semisterile plants under light microscopy. To detect nuclei and starch accumulation, hematoxylin staining (A and C) and I<sub>2</sub>-KI staining (B) were performed. No phenotypic abnormality was observed at these stages. Scale bars: 10 μm.



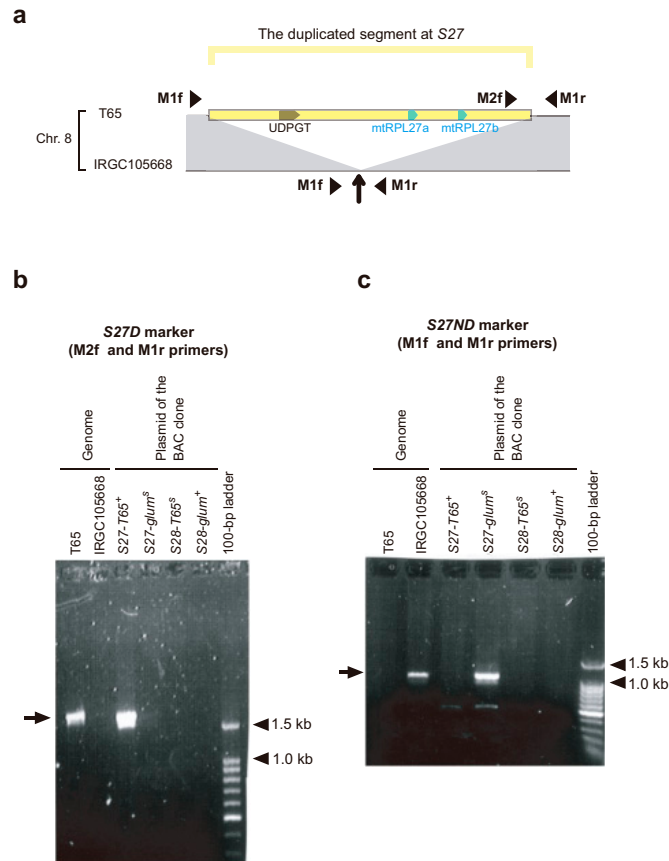

**Fig. S5.** PCR markers used to detect the presence and absence of the duplicated segment at S27. (A) Locations of the primers in the T65 and IRGC105668 genomic regions. Arrowheads indicate the location and direction of the primers. An arrow shows the location of the absence of the duplicated segment at S27-glum<sup>s</sup>. For the S27D marker used to detect the presence of the duplicated segment at S27, primers M2f and M1r were used. For the S27ND marker used to detect the absence of the duplicated segment at S27, primers M1f and M1r were used. (B and C) PCR amplification using the S27D and S27ND markers. The BAC clones GN21L06 and GN27D10, derived from T65, and GL12L12 and GL17D14, derived from IRGC105668, are represented by S27-T65<sup>+</sup>, S28-T65<sup>s</sup>, S27-glum<sup>s</sup>, and S28-glum<sup>+</sup>, respectively. (B) The PCR product obtained from the T65 genome using the S27D marker was amplified from the genomic sequence at the S27 region (arrow). (C) The PCR product obtained from the IRGC105668 genome using the S27ND marker was amplified from the genomic sequence at the S27 region (arrow).

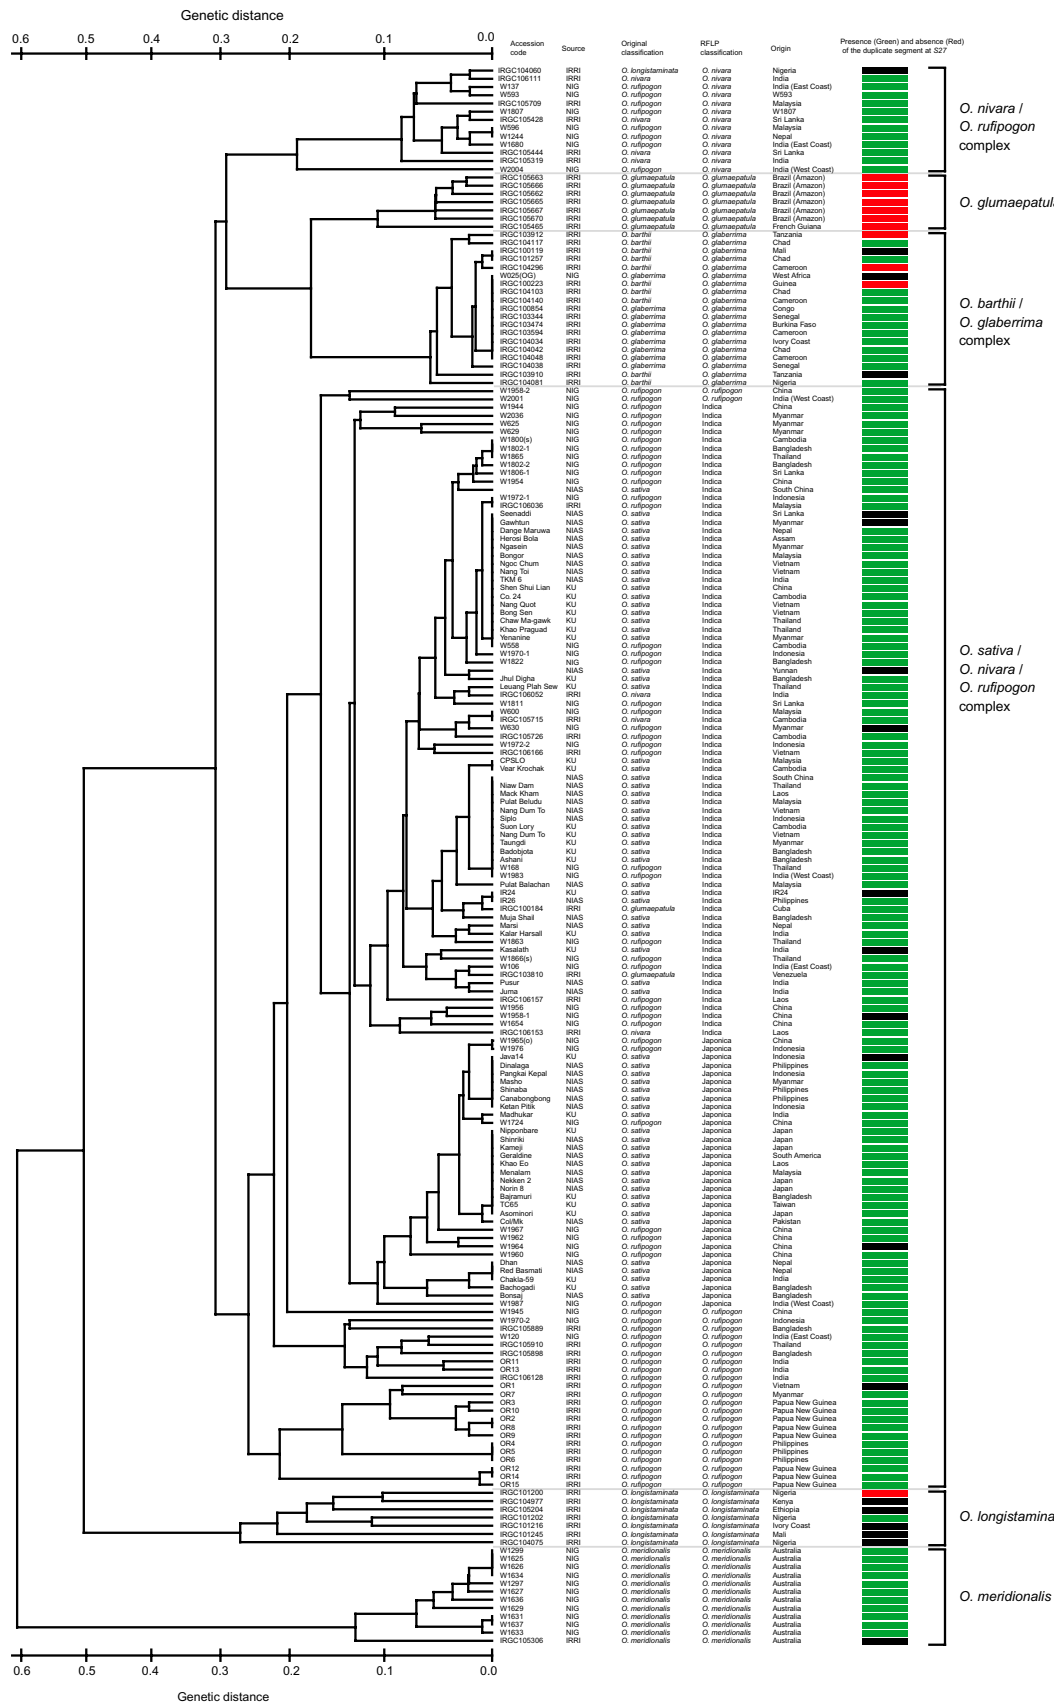

Fig. S6. Detailed distribution of the duplicated segment at S27 among the AA genome species. Green and red boxes indicate the accessions in which the duplicated segment at S27 was present and absent, respectively. Black boxes indicate the accessions for which PCR amplification was not obtained or for which

Legend continued on following page.

DNA samples were not available. AA genome species accessions were classified on the basis of restriction fragment length polymorphisms (1). The seeds or DNA were provided by the National Institute of Agrobiological Sciences (NIAS), Tsukuba, Japan; the National Institute of Genetics (NIG), Mishima, Japan; the International Rice Research Institute (IRRI), Los Baños, Philippines; and Kyushu University (KU), Fukuoka, Japan.

2. DoiKNonomuraMNYoshimuraAlwataNVaughanDARFLP relationships of A-genome species in the genus *Oryza* *J Fac Agr Kyushu Univ*458398.

**Table S1. Chi-square test of the observed ratio of genotypes in the progenies of the NIL113**

| Genotype*       |               |                | No. of individuals |                                | $\chi^2$ |
|-----------------|---------------|----------------|--------------------|--------------------------------|----------|
| <i>S27_ssr1</i> | <i>S28_10</i> | Expected ratio | Expected           | Observed                       |          |
| TT              | TT            | 1              | 10.2               | 15                             | 2.3      |
|                 | TG            | 2              | 20.3               | 23                             | 0.3      |
|                 | GG            | 1              | 10.2               | 10                             | 0.0      |
| TG              | TT            | 1              | 10.2               | 8                              | 0.5      |
|                 | TG            | 3              | 30.5               | 20                             | 3.6      |
|                 | GG            | 2              | 20.3               | 30                             | 4.6      |
| GG              | TT            | —              | —                  | 0                              | —        |
|                 | TG            | 1              | 10.2               | 10                             | 0.0      |
|                 | GG            | 1              | 10.2               | 6                              | 1.7      |
|                 |               |                |                    | $\chi^2_{\text{Total}} = 13.0$ |          |
|                 |               |                |                    | $n = 8$                        |          |
|                 |               |                |                    | $df = 7$                       |          |
|                 |               |                |                    | $P = 0.072^\dagger$            |          |

\*TT, TG, and GG indicate T65 homozygous, heterozygous, and IRGC105668 homozygous, respectively.

†The observed segregation ratio of the genotype fit the expected ratio at the 5% significance level.

**Table S2. PCR primers used in the high-resolution mapping of *S27* and *S28***

| Marker           | Marker type | Forward primer sequence | Reverse primer sequence | Restriction enzyme for CAPS marker |
|------------------|-------------|-------------------------|-------------------------|------------------------------------|
| <i>S27_ssr1</i>  | SSR         | ATGCGAAGGCAATGAAAAAG    | TGAAGCACAACGCTAACAGAG   | EcoRI                              |
| <i>S27_ssr11</i> | SSR         | TGGTGTAGCTAGGAGGCTAAA   | GGGATTTAAAGCCAACATTGA   |                                    |
| <i>S27_13</i>    | CAPS        | GTGCTAGCTTGGGCCTCTATTC  | CCAAACGAGGCACTTTTCATAC  |                                    |
| <i>S28_7</i>     | SNP         | TGTCATTTGTGTGGTCTGGTTC  | ATGCAGAGCACATCATGGATAC  |                                    |
| <i>S28_12</i>    | SNP         | GAAGCGCTCCTAGCTGTTTCTC  | ATGGTACTTTGGAGGGCAAGTC  |                                    |
| <i>S28_ssr20</i> | SSR         | CATGTCCAAAAGTCAACAACG   | AAAGTGGGCTTTTCCTTGG     |                                    |

SSR, simple sequence repeat; CAPS, cleaved amplified polymorphic sequence; SNP, single nucleotide polymorphism.

**Table S3. Locked-nucleic-acid-containing primers used for allele-specific RT-PCR**

| Target allele                | Allele type    | Primer sequence               |                          |
|------------------------------|----------------|-------------------------------|--------------------------|
|                              |                | Forward primer sequence*      | Reverse primer sequence* |
| <i>S27_T65</i> <sup>+</sup>  | Fertile allele | CATCATCATCCG <u>C</u> CAAAGAG | CTTGTTGCGCTCGAATCGC      |
| <i>S28-T65</i> <sup>s</sup>  | Sterile allele | CATCATCGTCCG <u>T</u> CAAAGAG | CTTGTTGCGCTCGAATCGC      |
| <i>S28-glum</i> <sup>+</sup> | Fertile allele | CATCATCGTCCG <u>C</u> CAAAGAG | CTTGTTGCGCTCGAATCGC      |

\*The locations of the locked nucleic acids are underlined.
